# Supplementary material for: Tribulus Terrestris for Female Sexual Dysfunction: A Systematic Review
Source: PubMed Central journal article supplement (PMC10316844; doi:10.1055/s-0040-1712123), 2020-07
Supplement: 10-1055-s-0040-1712123-s190269.pdf [file 10-1055-s-0040-1712123-s190269.pdf]

**Supplementary Table S1** Search strategies for all electronic databases

|                                                                                                         |                                                                                                                                                                                                                                                                                                                                                                                                                                                                                                                                                                      |
|---------------------------------------------------------------------------------------------------------|----------------------------------------------------------------------------------------------------------------------------------------------------------------------------------------------------------------------------------------------------------------------------------------------------------------------------------------------------------------------------------------------------------------------------------------------------------------------------------------------------------------------------------------------------------------------|
| Medline (via Pubmed)                                                                                    | #1 "Tribulus"[Mesh] OR (Tribulus terrestris) OR (Tribulus terrestris) OR (terrestris, Tribulus) OR (Tribulus muricatus) OR (Tribulus ORientalis) OR (Tribulus lanuginosus) OR (Zygophyllaceae) OR (Goathead) OR (Goatheads) OR (Puncture Vine) OR (Puncture Vines) OR (Vine, Puncture) OR (Vines, Puncture)<br>#2 ((clinical[Title/Abstract] AND trial[Title/Abstract]) OR clinical trials as topic[MeSH Terms] OR clinical trial[Publication Type] OR random*[Title/Abstract] OR random allocation[MeSH Terms] OR therapeutic use[MeSH Subheading])<br>#3 #1 AND #2 |
| Cochrane Central Register of Controlled Trials - CENTRAL (via Wiley)                                    | #1 MeSH descriptor: [Tribulus] explode all trees<br>#2 (Tribulus terrestris) OR (Tribulus terrestris) OR (terrestris, Tribulus) OR (Tribulus muricatus) OR (Tribulus ORientalis) OR (Tribulus lanuginosus) OR (Zygophyllaceae) OR (Goathead) OR (Goatheads) OR (Puncture Vine) OR (Puncture Vines) OR (Vine, Puncture) OR (Vines, Puncture)<br>#3 #1 OR #2<br>#4 #3 In Trials                                                                                                                                                                                        |
| Embase (via Elsevier)                                                                                   | #1 "tribulus"/exp OR 'tribulus terrestris'/exp<br>#2 tribulus OR 'tribulus terrestris' OR 'tribulus terrestris' OR 'tribulus muricatus' OR 'tribulus orientalis' OR 'tribulus lanuginosus' OR zygophyllaceae OR goathead OR goatheads OR 'puncture vine' OR 'puncture vines'<br>#3 #1 OR #2<br>#4 [embase]/lim NOT ([embase]/lim AND [medline]/lim)<br>#5 #3 AND #4                                                                                                                                                                                                  |
| Cumulative Index to Nursing and Allied Health Literature – CINAHL (EBSCO host)                          | #1 Tribulus MH Exact Subject Heading<br>#2Tribulus OR (Tribulus terrestris) OR (Tribulus terrestris) OR (Tribulus muricatus) OR (Tribulus orientalis) OR (Tribulus lanuginosus) OR Zygophyllaceae OR Goathead OR Goatheads OR (Puncture Vine) OR (Puncture Vines)<br>#3 #1 OR #2                                                                                                                                                                                                                                                                                     |
| Psyc INFO                                                                                               | #1 Any Field: Tribulus OR (Any Field: Tribulus terrestris) OR (Any Field: Tribulus terrestris) OR (Any Field: Tribulus muricatus) OR (Any Field: Tribulus orientalis) OR (Any Field: Tribulus lanuginosus) OR Any Field: Zygophyllaceae OR Any Field: Goathead OR Any Field: Goatheads OR (Any Field: Puncture Vine) OR (Any Field: Puncture Vines)                                                                                                                                                                                                                  |
| Literatura Latino Americana em Ciências da Saúde e do Caribe - LILACS (via Biblioteca Virtual em Saúde) | #1 MH":Tribulus terrestris" OR MH:HP4.018.716.673\$ OR MH":Tribulus" OR MH: B01.650.940.800.575.912.250.987.849\$ OR (Ikshugandha) OR (Abrolhos) OR (Abrolhos-Terrestres) OR (Cruz-de-Malta) OR (Videira da Punctura) OR (Caltrop) OR (Cathead) OR (Yellow Vine) OR (Burra Gokharu) OR (Bindii) OR (Tribulus terrestris) OR (Goatheads) OR (Puncture Vines) OR (Tribulus terrestris) OR (Vine, Puncture) OR (Vines, Puncture) OR (terrestris, Tribulus) OR (Goathead) OR (Puncture Vine) OR (Cadillo) OR (Cuernos de Chivo) OR (Tribulo) OR (Enredadera Espinuda)    |
| Clinical trials.gov                                                                                     | #1 Tribulus OR Tribulus Terrestris                                                                                                                                                                                                                                                                                                                                                                                                                                                                                                                                   |
| ICTRP (WHO)                                                                                             | #1 Tribulus OR Tribulus Terrestris                                                                                                                                                                                                                                                                                                                                                                                                                                                                                                                                   |

**Supplementary Table S2** Characteristic of ongoing studies

| Study/<br>Country               | Methods                       | Participants                               | Interventions                                                                                                                                                                                                                                                     | Outcomes                                                                                                                                           | Status                                                | Last Update      |
|---------------------------------|-------------------------------|--------------------------------------------|-------------------------------------------------------------------------------------------------------------------------------------------------------------------------------------------------------------------------------------------------------------------|----------------------------------------------------------------------------------------------------------------------------------------------------|-------------------------------------------------------|------------------|
| IRCT2016121<br>131340N1<br>Iran | RCT<br>Parallel<br>Assignment | Postmenopausal<br>women<br>No limit of age | Experimental (3<br>groups): Extract of<br>Hydro Alcolol of Teri-<br>bulus Teristris, Syrup<br>in 0.5, 0.7 and 0.9-<br>mg/dl, respectively<br>Control: syrups con-<br>taining mannitol con-<br>centration of 0.5 Mg dl<br>Treatment: twice a day<br>for two months | Sexual Function (FSFI<br>Questionnaire)<br>Sexual Satisfaction<br>(Larenson Question-<br>naire)<br>Time point: 4 and<br>8 weeks post-<br>treatment | Recruitment Com-<br>plete (retrospective<br>register) | February<br>2018 |

mg/dl, milligram/deciliter; RCT, Randomized clinical trial.

**Supplementary Table S3** Summary of findings table

| Tribulus terrestris compared with placebo for female sexual dysfunction                                                                 |                                                 |                                                                                                              |                          |                              |                                   |                                                                                                                                        |
|-----------------------------------------------------------------------------------------------------------------------------------------|-------------------------------------------------|--------------------------------------------------------------------------------------------------------------|--------------------------|------------------------------|-----------------------------------|----------------------------------------------------------------------------------------------------------------------------------------|
| Patient or population: Women with sexual dysfunction                                                                                    |                                                 |                                                                                                              |                          |                              |                                   |                                                                                                                                        |
| Setting: Ambulatory                                                                                                                     |                                                 |                                                                                                              |                          |                              |                                   |                                                                                                                                        |
| Intervention: <i>Tribulus terrestris</i>                                                                                                |                                                 |                                                                                                              |                          |                              |                                   |                                                                                                                                        |
| Comparison: Placebo                                                                                                                     |                                                 |                                                                                                              |                          |                              |                                   |                                                                                                                                        |
| Outcomes                                                                                                                                | Anticipated absolute effects* (95% CI)          | Risk with Tribulus terrestris                                                                                | Relative effect (95% CI) | N° of participants (studies) | Certainty of the evidence (GRADE) | Comments                                                                                                                               |
| <b>Sexual function</b><br>Assessed with Female Sexual Function Index (FSFI)<br>Scale from: 2 to 36<br>Follow up: mean 1 month           | The mean sexual function was <b>2.87</b> points | The mean sexual function in the intervention group was <b>4.39</b> points higher (2.9 higher to 5.88 higher) | –                        | 60 (1 RCT)                   | ⊕○○○<br>VERY LOW <sup>a,b</sup>   | The evidence is very uncertain about the effect of tribulus terrestris on sexual function.                                             |
| <b>Sexual function</b><br>Assessed with Sexual Quotient Female Questionnaire (SQ-F)<br>Scale from: 0 to 100<br>Follow up: mean 3 months | The mean sexual function was <b>54.5</b> points | The mean sexual function in the intervention group was 16.40 points higher (7.67 higher to 25.13 higher)     | –                        | 60 (1 RCT)                   | ⊕○○○<br>VERY LOW <sup>b,c</sup>   | The evidence is very uncertain about the effect of tribulus terrestris on sexual function.                                             |
| <b>Serious Adverse events</b><br>Follow up: mean 1 month                                                                                | See comment                                     | See comment                                                                                                  | See comment              | 60 (1 RCT)                   | ⊕○○○<br>VERY LOW <sup>a,b</sup>   | Only one study evaluated adverse events; one participant had abdominal cramp, but authors did not specify to which group she belonged. |

<sup>a</sup>The risk in the intervention group (and its 95% confidence interval) is based on the assumed risk in the comparison group and the **relative effect** of the intervention (and its 95% CI). **CI:** Confidence interval; **MD:** Mean difference

**GRADE Working Group grades of evidence**  
**High certainty:** We are very confident that the true effect lies close to that of the estimate of the effect  
**Moderate certainty:** We are moderately confident in the effect estimate: The true effect is likely to be close to the estimate of the effect, but there is a possibility that it is substantially different  
**Low certainty:** Our confidence in the effect estimate is limited: The true effect may be substantially different from the estimate of the effect  
**Very low certainty:** We have very little confidence in the effect estimate: The true effect is likely to be substantially different from the estimate of effect Q10

**Explanations.**

<sup>a</sup>We downgraded one level due to risk of bias (lack of information about random sequence generation and allocation concealment).  
<sup>b</sup>We downgraded two levels due to imprecision (small sample size, N = only 60 participants).  
<sup>c</sup>We downgraded two levels due to risk of bias (lack of information about random sequence generation, allocation concealment and blinding).
